# Supplementary material for: Chemoenzymatic synthesis of polypeptides containing the unnatural amino acid 2-aminoisobutyric acid
Source: Royal Society of Chemistry journal article supplement (doi:10.1039/c7cc03095a), 2017-01-01
Supplement: c7cc03095a1.pdf [file c7cc03095a1.pdf]

**Electronic Supplementary Information for Chemical Communications**

**Chemoenzymatic synthesis of polypeptides  
containing the unnatural amino acid 2-  
aminoisobutyric acid**

**Kousuke Tsuchiya,\* Keiji Numata\***

**Enzyme Research Team, Biomass Engineering Research Division, RIKEN Center  
for Sustainable Resource Science, 2-1 Hirosawa, Wako, Saitama 351-0198, Japan.**

## Experimental

**Materials.** Papain was purchased from Wako Pure Chemical Industries, Ltd. (Osaka, Japan) and used as received. The activity was approximately  $0.5 \text{ U g}^{-1}$ , where one unit is defined to hydrolyze 1 mmol of *N*-benzoyl-DL-arginine *p*-nitroanilide per minute at pH 7.5 and 25 °C. Diethyl ether and triethylamine were dried over 4Å molecular sieves and stored under nitrogen. The Aib-containing dipeptide AibAla-OEt and tripeptide, AlaAibAla-OEt, were synthesized via a modified conventional solution method according to the reported procedure.<sup>1</sup> All other reagents were used as received without any purification unless otherwise noted.

### Synthesis of AibAla-OEt HCl salt.

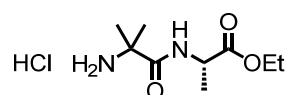

To a flask equipped with an addition funnel and a stir bar were added  $\alpha$ -(Bocamino)isobutyric acid (10.16 g, 50 mmol), L-alanine ethyl ester hydrochloride (7.68 g, 50 mmol), 1-hydroxybenzotriazole (HOBt) monohydrate (6.76 g, 50 mmol), triethylamine (7.0 mL, 50 mmol) and chloroform (50 mL) at  $-10$  °C under nitrogen. A solution of 1-ethyl-3-(3-dimethylaminopropyl)carbodiimide (water-soluble carbodiimide, WSCI) hydrochloride (9.59 g, 50 mmol) in chloroform (50 mL) was added dropwise over

30 min, and the resulting mixture was stirred at  $-10\text{ }^{\circ}\text{C}$  for 30 min and then at  $25\text{ }^{\circ}\text{C}$  for 24 h. The mixture was washed sequentially with water, 5%  $\text{NaHCO}_3$  aq., and brine. The organic layer was dried with  $\text{Na}_2\text{SO}_4$  and concentrated using a rotary evaporator. The product was dried in vacuo to give Boc-AibAla-OEt in a yield of 13.9 g (92%). The obtained Boc-AibAla-OEt was then subjected to deprotection of the Boc group. To the solution of Boc-AibAla-OEt (7.56 g, 25 mmol) in dichloromethane (15 mL) was slowly added trifluoroacetic acid (9.6 mL, 0.125 mol) at  $0\text{ }^{\circ}\text{C}$  under nitrogen. The mixture was stirred at  $0\text{ }^{\circ}\text{C}$  for 10 min and then at  $25\text{ }^{\circ}\text{C}$  for 24 h. After the solvent was removed under reduced pressure, the crude product was dissolved in dioxane/HCl (4 M, 10 mL). The solution was poured into diethyl ether. The precipitate was filtered, washed with diethyl ether, and dried in vacuo to afford AibAla-OEt as a white hygroscopic solid. The yield was 5.47 g (92%).

#### **Synthesis of AlaAibAla-OEt HCl salt.**

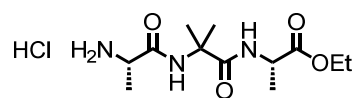

To a flask equipped with an addition funnel and a stir bar were added *N*-Boc-L-alanine (1.59 g, 8.4 mmol), AibAla-OEt hydrochloride (2.0 g, 8.4 mmol), HOBt monohydrate (1.28 g, 8.4 mmol), triethylamine (1.2 mL, 8.4 mmol) and chloroform (10 mL) at  $-10\text{ }^{\circ}\text{C}$  under nitrogen. A solution of WSCI hydrochloride (1.61 g, 8.4 mmol) in chloroform (10

mL) was added dropwise over 30 min, and the resulting mixture was stirred at  $-10\text{ }^{\circ}\text{C}$  for 30 min and then at  $25\text{ }^{\circ}\text{C}$  for 24 h. The mixture was washed sequentially with water, 5%  $\text{NaHCO}_3$  aq., and brine. The organic layer was dried with  $\text{Na}_2\text{SO}_4$  and concentrated using a rotary evaporator. The product was dried in vacuo to give Boc-AlaAibAla-OEt in a yield of 2.45 g (78%). The obtained Boc-AlaAibAla-OEt was subsequently subjected to deprotection of the Boc group. To the solution of Boc-AlaAibAla-OEt (2.45 g, 6.6 mmol) in dichloromethane (6.0 mL) was slowly added trifluoroacetic acid (9.6 mL, 0.125 mol) at  $0\text{ }^{\circ}\text{C}$  under nitrogen. The mixture was stirred at  $0\text{ }^{\circ}\text{C}$  for 10 min and then at  $25\text{ }^{\circ}\text{C}$  for 24 h. After the solvent was removed under reduced pressure, the crude product was dissolved in dioxane/HCl (4 M, 3 mL). The solution was poured into diethyl ether. The precipitate was filtered, washed with diethyl ether, and dried in vacuo to afford AlaAibAla-OEt as a white hygroscopic solid. The yield was 1.98 g (97%).

**General procedure of chemoenzymatic polymerization using papain.** Poly(L-alanine) (polyAla) was synthesized by papain-catalyzed polymerization of L-alanine ethyl ester hydrochloride according to a previously reported procedure.<sup>2</sup> The general procedure for the chemoenzymatic polymerization of Aib-containing monomers was as follows (Run 6 in Table 1): to a glass tube equipped with a stir bar were added AlaAibAla-OEt HCl salt (0.155 g, 0.5 mmol) and phosphate buffer (1 mL, 1 M, pH = 8.0), and the mixture

was stirred at 40 °C until all of the substrates were completely dissolved. To this solution was added a solution of papain (0.100 g) in phosphate buffer (0.5 mL) in one portion. The final concentrations of AlaAibAla-OEt and papain were 0.25 M and 50 mg/mL, respectively. The mixture was stirred at 800 rpm and 40 °C for 6 h. After the mixture cooled to room temperature, the precipitate was collected by centrifugation at 7000 rpm for 10 min at 4 °C. The crude product was washed twice with deionized water and lyophilized to provide the oligopeptide as a white solid. The yield was 0.037 g (33%).

**Time course experiment on chemoenzymatic polymerization of AlaAibAla-OEt.** To a glass tube equipped with a stir bar were added AlaAibAla-OEt HCl salt (0.155 g, 0.5 mmol) and phosphate buffer (1 mL, 1 M, pH = 8.0), and the mixture was stirred at 40 °C until all the substrates were completely dissolved. To this solution was added a solution of papain (0.100 g) in phosphate buffer (0.5 mL) in one portion. After the reaction was started at 40 °C, an aliquot (10  $\mu$ L) of the final solution was taken at 0, 5, 10, 15, 20, 30, 40, 50, 60, 80, 100, and 120 min, and dissolved in dimethylsulfoxide- $d_6$  (DMSO- $d_6$ , 0.5 mL). These samples were subjected to  $^1\text{H}$  nuclear magnetic resonance (NMR) measurement, and the signal intensities of  $\alpha$ -methyl protons in Ala and Aib residues and of methyl group in ethanol (leaving group) in  $^1\text{H}$  NMR spectra was compared to determine the conversion.

**Analyses.** The infrared (IR) spectra of the bulk samples were recorded by using an IRPrestige-21 Fourier transform infrared spectrophotometer (Shimadzu Corporation, Kyoto, Japan) with a MIRacle A single-reflection attenuated total reflection (ATR) unit using a Ge prism. The  $^1\text{H}$  and  $^{13}\text{C}$  NMR spectra were recorded using a JNM-EX270 (JEOL, Tokyo, Japan) at 25 °C and at frequencies of 270 and 67.5 MHz, respectively. DMSO- $d_6$  with trifluoroacetic acid- $d$  (TFA- $d$ ) (5/1 in volume) was used as the solvent for the polypeptides; tetramethylsilane was used as the internal standard. A Matrix-Assisted Laser Desorption/Ionization Time-of-Flight (MALDI TOF) mass spectrometric analysis was conducted using an ultrafleXtreme MALDI-TOF spectrophotometer (Bruker Daltonics, Billerica, MA, USA) operated in reflection mode at an accelerating voltage of 15 kV. The sample was dissolved in water/acetonitrile (0.8 mg/mL,) containing 0.1% TFA, mixed with a solution of  $\alpha$ -cyano-4-hydroxycinnamic acid (CHCA) in water/acetonitrile (10 mg/mL), and deposited onto an MTP 384 ground steel BC target plate. A circular dichroism (CD) spectroscopic analysis was conducted using a Jasco J-820 CD spectropolarimeter (JASCO, Tokyo, Japan). Measurements were conducted on polypeptide solutions (100  $\mu\text{M}$ ) in 2,2,2-trifluoroethanol (TFE) using a quartz cuvette with a 0.1 cm path length. Each spectrum represents the average of 10 scans from 190 to 290 nm with a resolution of 1 nm, obtained at 200 nm  $\text{min}^{-1}$  with a bandwidth of 1 nm.

## References

1. E. Galoppini and M. A. Fox, *J. Am. Chem. Soc.*, 1996, **118**, 2299.
2. P. J. Baker and K. Numata, *Biomacromolecules*, 2012, **13**, 947.

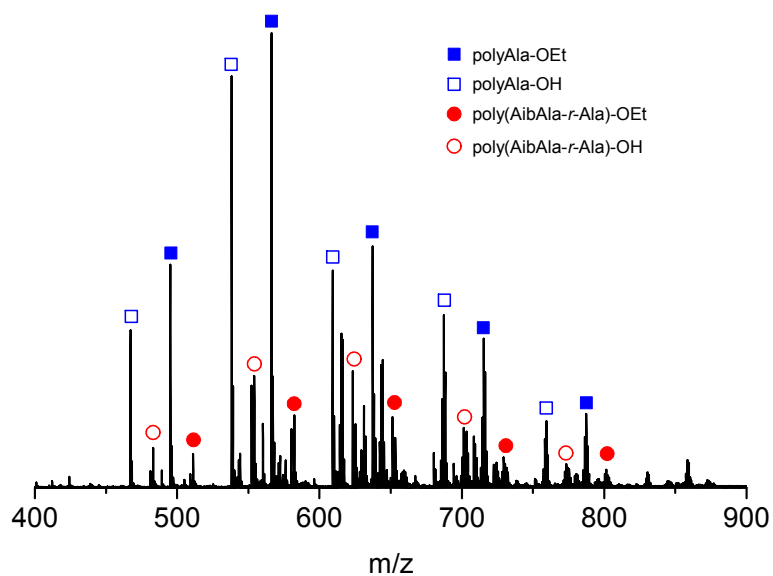

Fig. S1 MALDI-TOF mass spectrum of poly(AibAla-*r*-Ala) (Run 4, Table 1). Filled and open symbols indicate the series of peaks for polypeptides with ethyl ester and carboxylic acid (hydrolyzed) terminal groups, respectively.



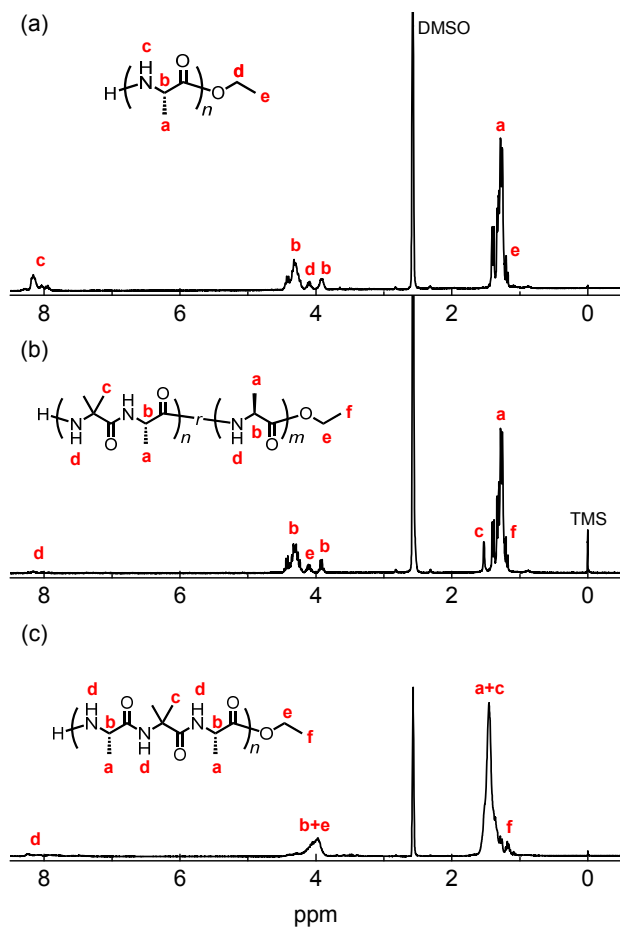

Fig. S2  $^1\text{H}$  NMR spectra of (a) poly(L-alanine) (polyAla), (b) poly(AibAla-*r*-Ala) (Run 4, Table 1), and (c) poly(AlaAibAla) (Run 6, Table 1) in DMSO- $d_6$ /TFA- $d$  (5/1 in volume).

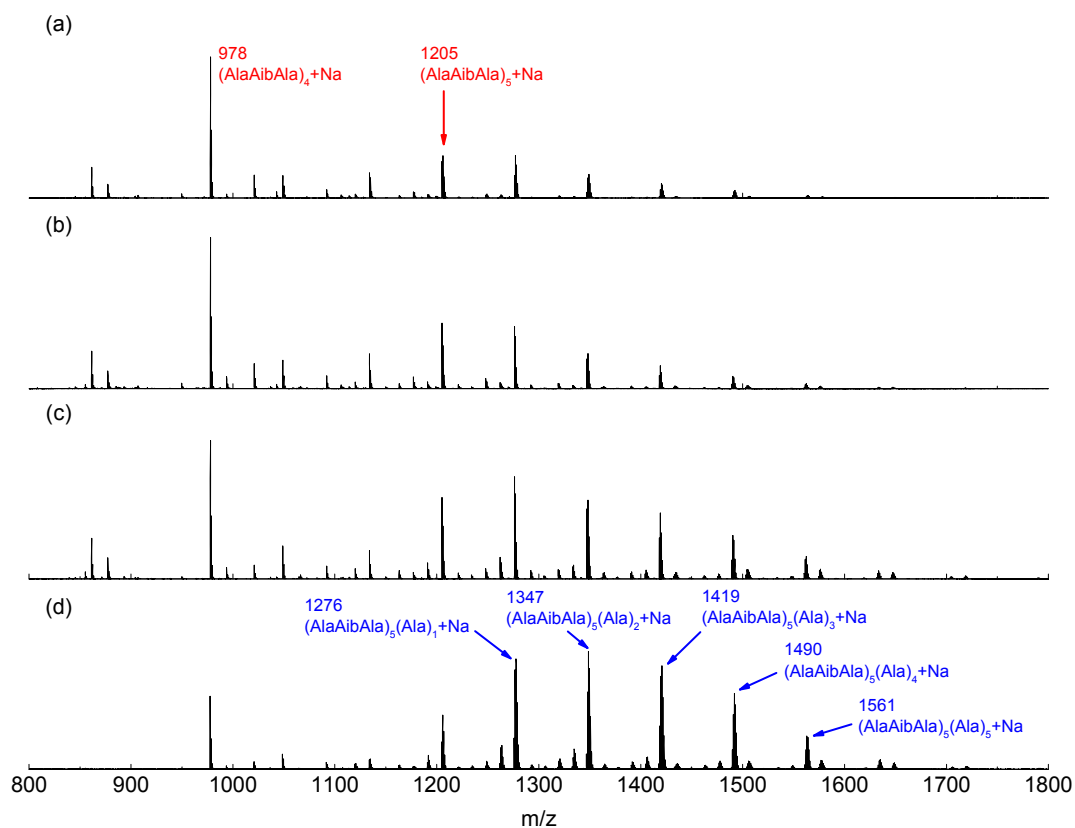

Fig. S3 MALDI-TOF mass spectra of the poly(AlaAibAla)s obtained by chemoenzymatic polymerization using papain at monomer feed concentrations of (a) 0.17 M (Run 5, Table 1), (b) 0.25 M (Run 6, Table 1), (c) 0.33 M (Run 7, Table 1), and (d) 0.5 M (Run 8, Table 1).

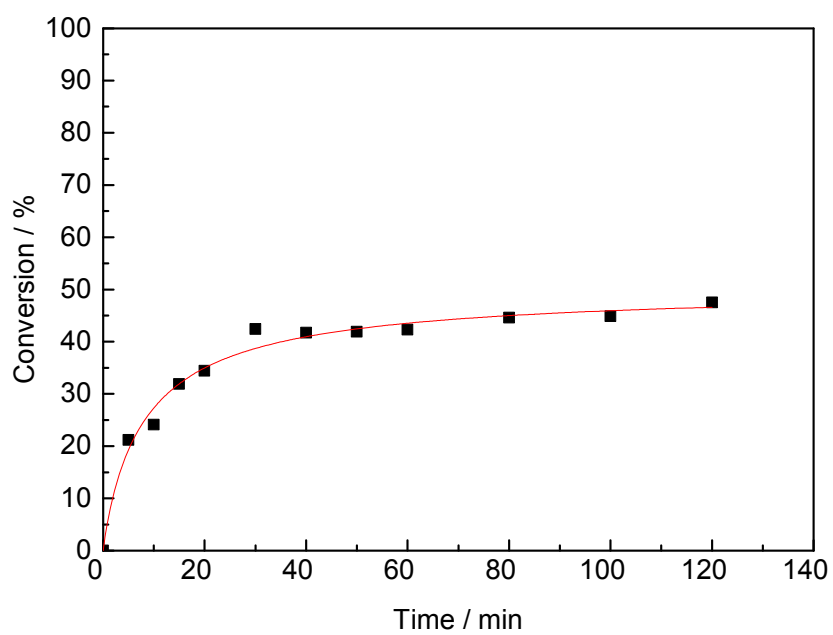

Fig. S4 Time course experiment on the enzymatic polymerization of AlaAibAla-OEt (0.25 M) using papain at 40 °C.
